# Supplementary material for: Fully Automated Macro- and Microfluidic Production of [68Ga]Ga-Citrate on mAIO® and iMiDEVTM Modules
Source: Molecules. 2022 Feb 1;27(3):994. doi: 10.3390/molecules27030994 (PMC8838513; doi:10.3390/molecules27030994)
Supplement: Supplementary file 1 [file molecules-27-00994-s001.zip › molecules-1540852-supplementary.pdf]

## Supplementary Materials:

### Fully Automated Macro- and Microfluidic Production of [ $^{68}\text{Ga}$ ]Ga-citrate on mAIO<sup>®</sup> and iMiDEV<sup>™</sup> modules

Olga Ovdichuk<sup>1\*</sup>, Emilie Roeder<sup>1</sup>, Sébastien Billotte<sup>1</sup>, Nicolas Veran<sup>2</sup>, Charlotte Collet<sup>1,3\*</sup>

<sup>1</sup> Nancyclotep, Molecular Imaging platform, F-54500 Vandoeuvre-les-nancy, France

<sup>2</sup> CHRU-Nancy, Service de Medecine Nucléaire, Pôle Pharmacie, F-54000 Nancy, France

<sup>3</sup> Université de Lorraine, Inserm, IADI, F-54000 Nancy, France

Corresponding authors E-mail addresses:

**Charlotte Collet** Email: charlotte.collet@univ-lorraine.fr

**Olga Ovdichuk** Email: o.ovdichuk@nancyclotep.com

## Table of Contents

**Figure S1.** Radioactivity curve of trap-release process observed during radiosynthesis of [ $^{68}\text{Ga}$ ]Ga-citrate on mAIO<sup>®</sup>.

**Figure S2.** Schematic representation of the steps used for [ $^{68}\text{Ga}$ ]Ga-citrate synthesis in R1 chamber: a) activity reception ; b) washing; c) elution and delivery of [ $^{68}\text{Ga}$ ]Ga-citrate.

**Figure S3.** Radioactivity curve of trap-release process observed during radiosynthesis of [ $^{68}\text{Ga}$ ]Ga-citrate on R1 chamber filled with PS-H+ on iMiDEV<sup>™</sup>.

**Figure S4.** Comparison of radiochromatograms obtained using different systems described in the literature for [ $^{68}\text{Ga}$ ]Ga-citrate radiochemical purity determination.

**Figure S5.** Representative radio-TLC of [ $^{68}\text{Ga}$ ]Ga-citrate in serum 1h post-incubation at 37 °C.

**Figure S6.** Schematic representation of the steps used for [ $^{68}\text{Ga}$ ]Ga-citrate synthesis in R3 chamber: a) activity reception ; b) washing; c) elution and delivery of [ $^{68}\text{Ga}$ ]Ga-citrate.

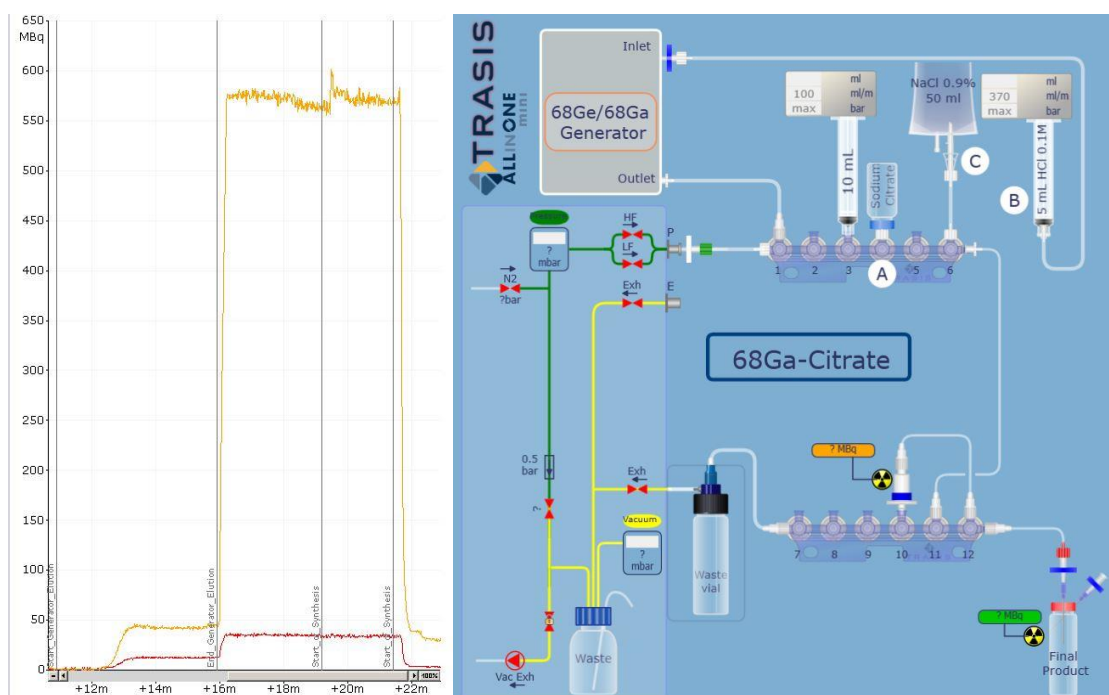

**Figure S1.** Radioactivity curve of trap-release process observed during radiosynthesis of [ $^{68}\text{Ga}$ ]Ga-citrate on mAIO<sup>®</sup>. Highlighted in orange – radioactive detector place near the position 10. highlighted in red – radioactive detector placed next to the oven.

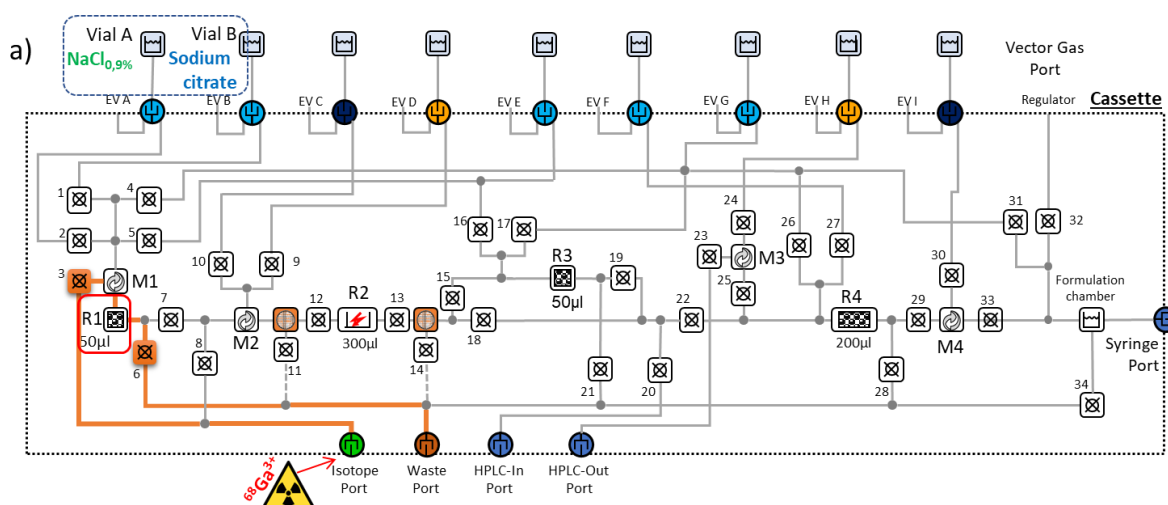

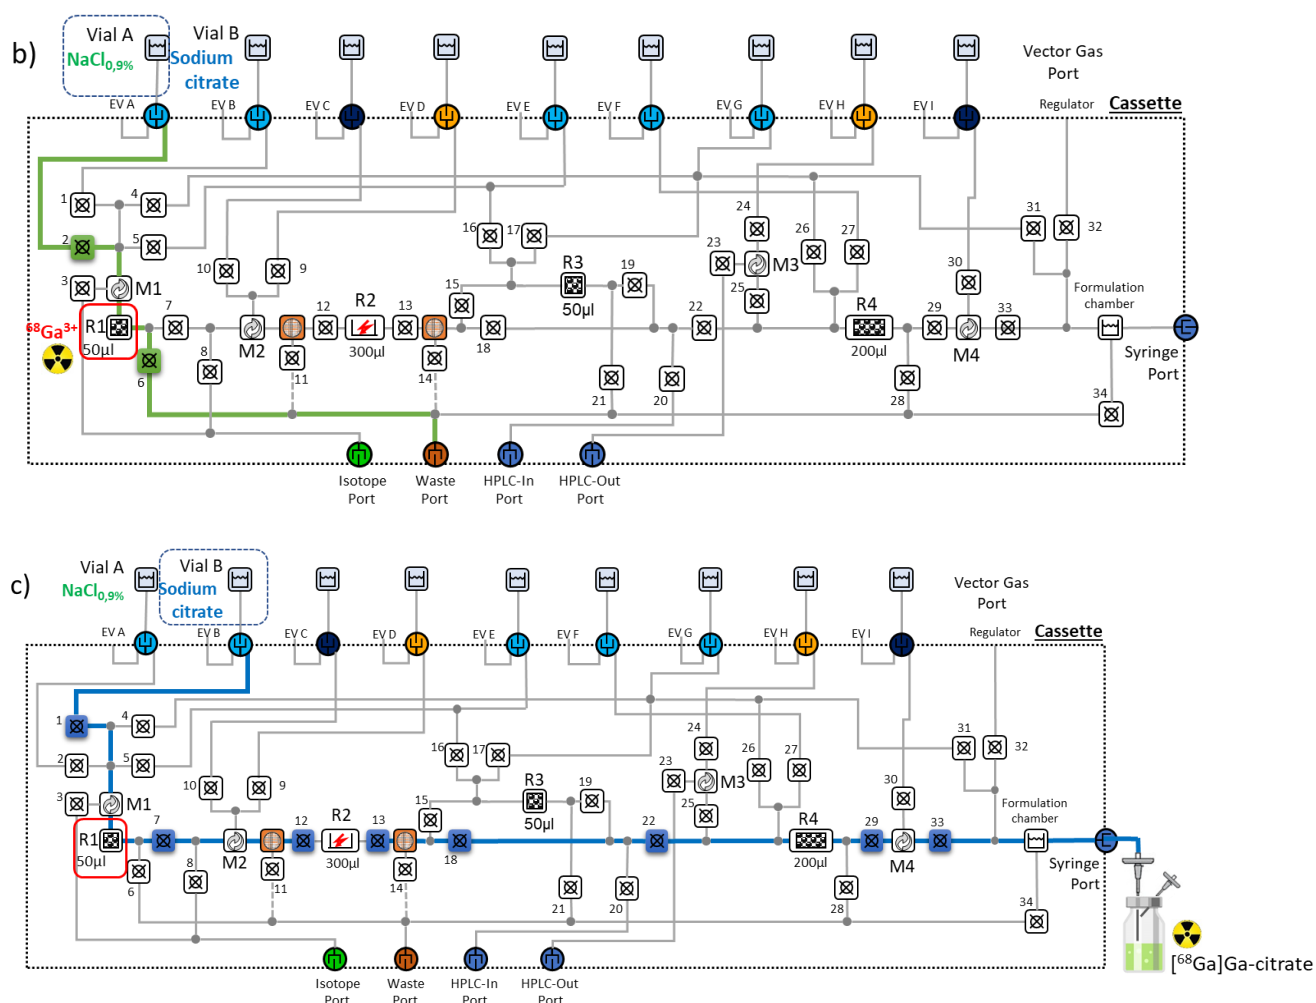

**Figure S2.** Schematic representation of the steps used for  $[^{68}\text{Ga}]\text{Ga-citrate}$  synthesis in R1 chamber: a) activity reception ; b) washing; c) elution and delivery of  $[^{68}\text{Ga}]\text{Ga-citrate}$ .

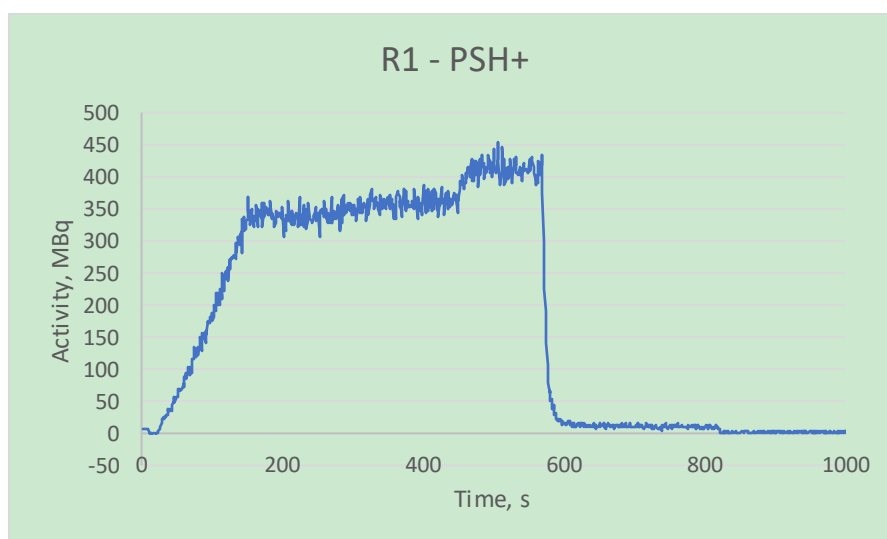

**Figure S3.** Radioactivity curve of trap-release process observed during radiosynthesis of  $[^{68}\text{Ga}]\text{Ga-citrate}$  on R1 chamber filled with PS-H+ on iMiDEV™; Starting activity – 417 MBq.

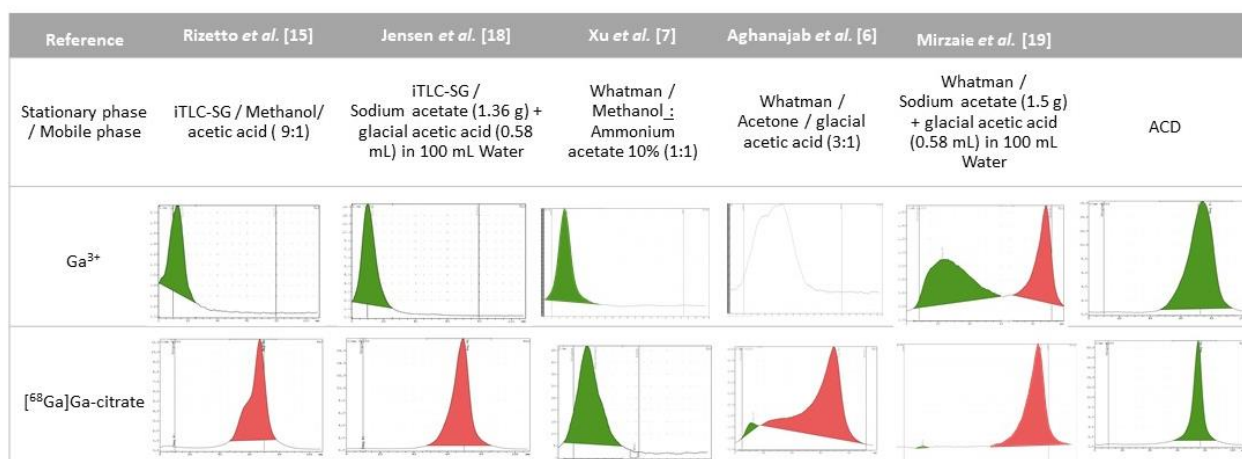

**Figure S4.** Comparison of radiochromatograms obtained using different systems described in the literature for  $[^{68}Ga]Ga\text{-citrate}$  radiochemical purity determination.

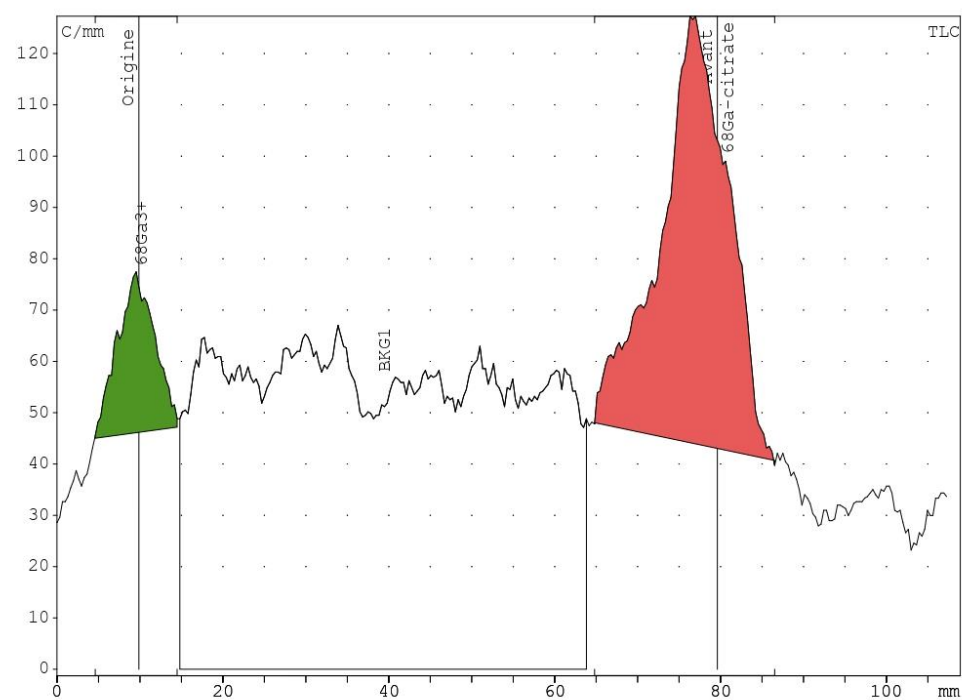

#### Description de l'échantillon

Etude: Gallium-68  
 Mesure: Ga1306 serum 10uL 1h, démarré: 02/11/2021 12:32  
 Méthode: GALLIUM Date: 02/11/2021 12:32  
 Origine: 10 mm Avant: 80 mm  
 Temps mesure: 0:05:00 h:m:s Résolution: 0,33 mm  
 Haute tension: 890,0 V  
 Phase mobile: AcONa 1.5g / AcOH 0.58mL / H2O 100mL ; 10uL  
 Détecteur de radioactivité: Elysia-raytest miniGita (BGO) Numéro de série: 1701198  
 Version du logiciel: 6.3, service pack 2, build 6415

#### Intégration TLC

| Substance             | R/T<br>mm | R/F   | %Total<br>% | Aire<br>Counts | %Aire<br>% |
|-----------------------|-----------|-------|-------------|----------------|------------|
| $68Ga^{3+}$           | 10        | 0.000 | 4.47        | 174,5714       | 17,81      |
| $68Ga\text{-citrate}$ | 76        | 0.953 | 20.64       | 805,5714       | 82,19      |
| Somme en ROI          | -         | -     | -           | 980,1429       | 100,00     |
| Aire générale         | -         | -     | -           | 3903,5235      | -          |
| Aire (total) RF       | -         | -     | -           | 465,1007       | -          |
| BKG1 (CPS)            | -         | -     | -           | 56,41651       | -          |
| Reste (total)         | -         | -     | -           | 2923,38        | 74,89      |

**Figure S5.** Representative radio-TLC of [ $^{68}\text{Ga}$ ]Ga-citrate in serum 1h post-incubation at 37 °C.

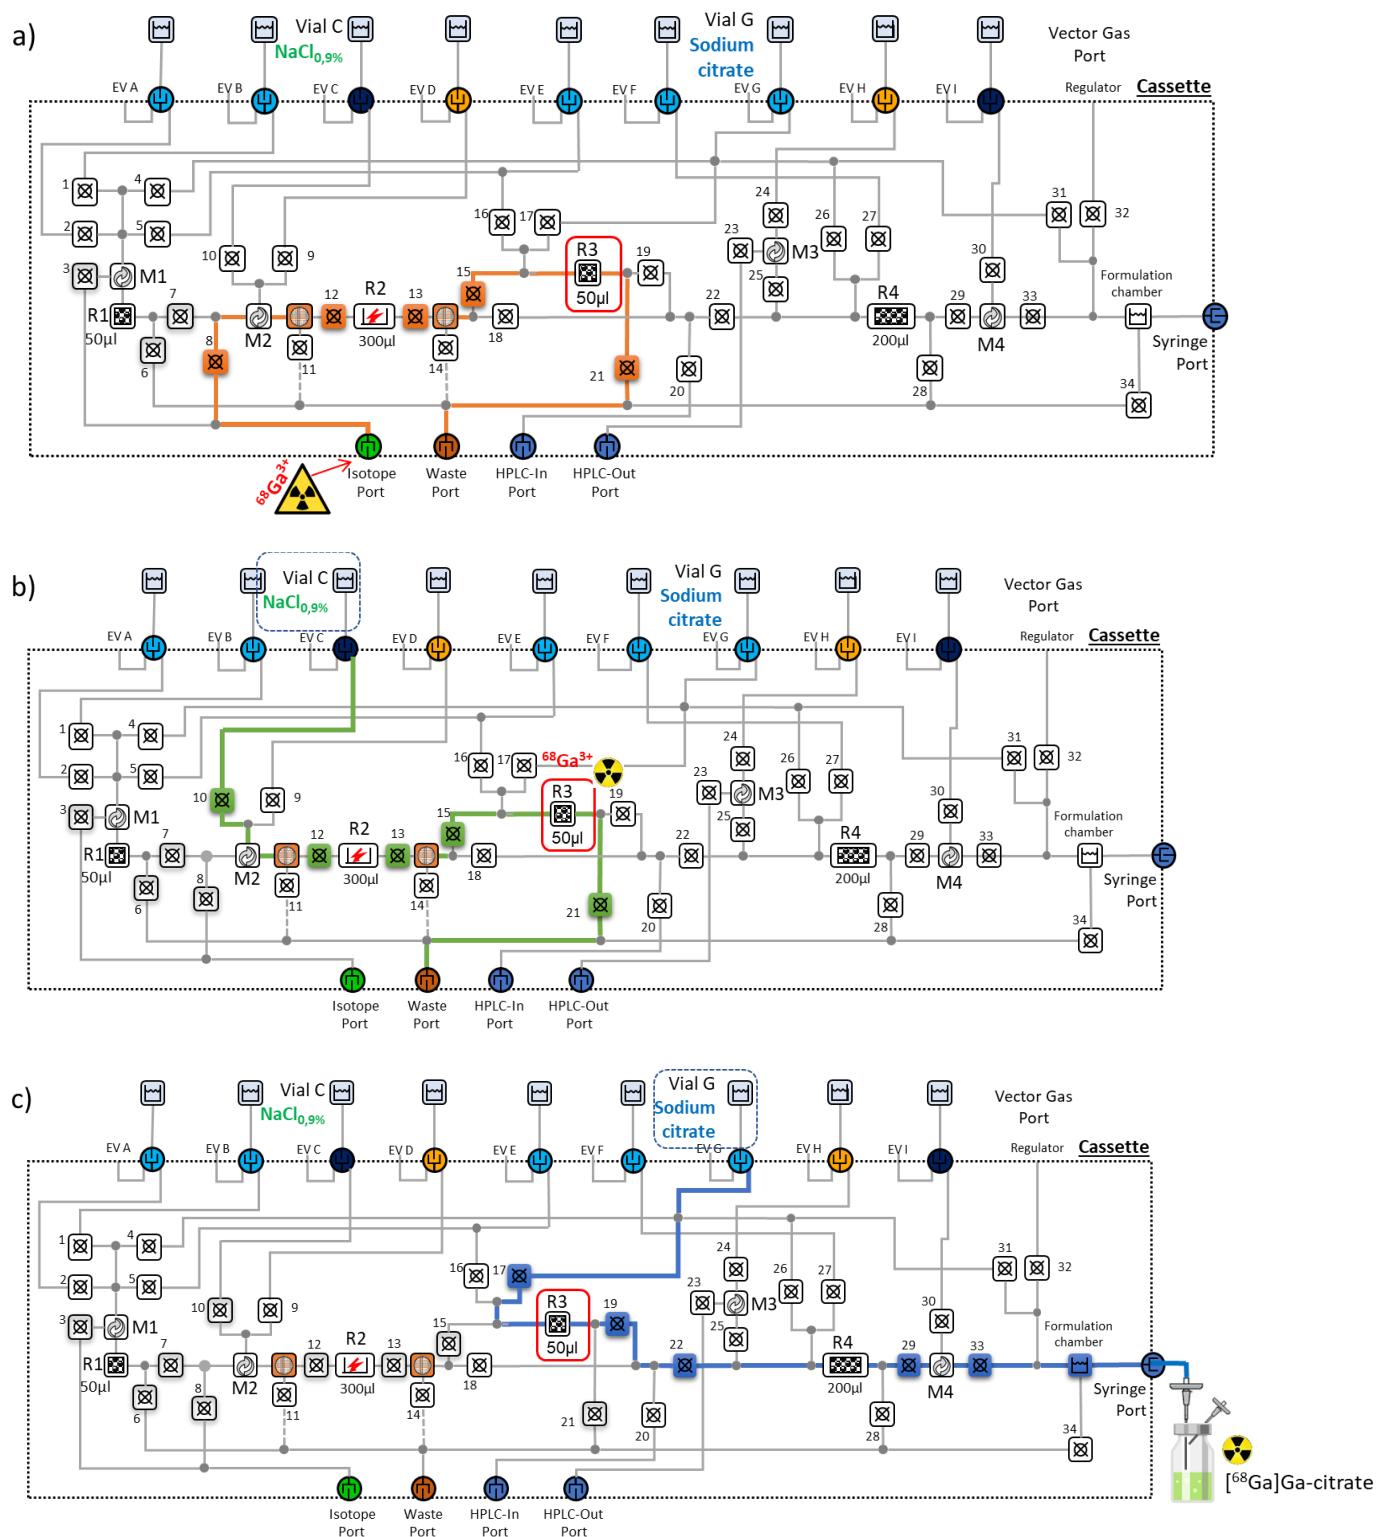

**Figure S6.** Schematic representation of the steps used for [ $^{68}\text{Ga}$ ]Ga-citrate synthesis in R3 chamber: a) activity reception ; b) washing; c) elution and delivery of [ $^{68}\text{Ga}$ ]Ga-citrate.
